# Supplementary material for: A usability study of two formats of a shortened systematic review for clinicians
Source: HighWire-hosted journal article supplement (doi:10.1136/bmjopen-2014-005919), 2014-12-01
Supplement: bmjopen-2014-005919supp_appendixB.pdf [file bmjopen-2014-005919supp_appendixB.pdf]

## Appendix B. System Usability Scale

The questionnaire gives a series of statements about the document you just viewed.  
Rate your agreement with each statement.

|                                                                                   | <b>Strongly<br/>Disagree</b> |                          |                          |                          | <b>Strongly<br/>Agree</b> |
|-----------------------------------------------------------------------------------|------------------------------|--------------------------|--------------------------|--------------------------|---------------------------|
| 1. I think that I would like to use this type of document frequently              | <input type="checkbox"/>     | <input type="checkbox"/> | <input type="checkbox"/> | <input type="checkbox"/> | <input type="checkbox"/>  |
| 2. I found the document unnecessarily complex                                     | <input type="checkbox"/>     | <input type="checkbox"/> | <input type="checkbox"/> | <input type="checkbox"/> | <input type="checkbox"/>  |
| 3. I thought the document was easy to use                                         | <input type="checkbox"/>     | <input type="checkbox"/> | <input type="checkbox"/> | <input type="checkbox"/> | <input type="checkbox"/>  |
| 4. I think that I would need support to be able to use this document              | <input type="checkbox"/>     | <input type="checkbox"/> | <input type="checkbox"/> | <input type="checkbox"/> | <input type="checkbox"/>  |
| 5. I found the various features of this document well integrated                  | <input type="checkbox"/>     | <input type="checkbox"/> | <input type="checkbox"/> | <input type="checkbox"/> | <input type="checkbox"/>  |
| 6. I thought there was too much inconsistency in this document                    | <input type="checkbox"/>     | <input type="checkbox"/> | <input type="checkbox"/> | <input type="checkbox"/> | <input type="checkbox"/>  |
| 7. I would imagine that most people would learn to use this document very quickly | <input type="checkbox"/>     | <input type="checkbox"/> | <input type="checkbox"/> | <input type="checkbox"/> | <input type="checkbox"/>  |
| 8. I found the document very cumbersome to use                                    | <input type="checkbox"/>     | <input type="checkbox"/> | <input type="checkbox"/> | <input type="checkbox"/> | <input type="checkbox"/>  |
| 9. I felt very confident using the document                                       | <input type="checkbox"/>     | <input type="checkbox"/> | <input type="checkbox"/> | <input type="checkbox"/> | <input type="checkbox"/>  |
| 10. I needed to learn a lot of things before I could get going with this document | <input type="checkbox"/>     | <input type="checkbox"/> | <input type="checkbox"/> | <input type="checkbox"/> | <input type="checkbox"/>  |
