# Supplementary material for: A usability study of two formats of a shortened systematic review for clinicians
Source: HighWire-hosted journal article supplement (doi:10.1136/bmjopen-2014-005919), 2014-12-01
Supplement: bmjopen-2014-005919supp_appendixC.pdf [file bmjopen-2014-005919supp_appendixC.pdf]

# Rosacea

## Systematic Review of Treatments

Source: van Zuuren EJ, Gupta AK, Grover MD, Graber M, Hollis S. Systematic review of rosacea treatments. J Am Acad Dermatol. 2007 Jan;56(1): 107–15

Conflicts of Interest: None identified to the journal citation

### CLINICAL SUMMARY

#### EFFECTIVE

- Topical metronidazole and azelaic acid are effective for short-term use.
- There is some evidence that oral tetracycline may be effective for ocular rosacea.

#### UNKNOWN EFFECT

- There is insufficient RCT evidence to assess rilmenidine (for flushing), benzoyl peroxide/clindamycin (for limited pustules), or sulfacetamide/sulfur (for limited pustules).
- There is no RCT evidence available on clonidine (for flushing), tretinoin cream (for limited pustules), ampicillin (for extensive skin lesions), isotretinoin (for persistent rosacea), metronidazole (for ocular rosacea), or fusidic acid gel (for ocular rosacea).
- There is no RCT evidence available on any treatments for vascular symptoms or rhinophyma.

#### UNLIKELY EFFECTIVE

- Nothing to report.

#### POSSIBLY INEFFECTIVE OR HARMFUL

- Nothing to report.

### REVIEW INFORMATION

|               |                                                                                |
|---------------|--------------------------------------------------------------------------------|
| Participants  | Adults, 19 years or older with moderate to severe rosacea                      |
| Interventions | Any type of rosacea treatment                                                  |
| Outcomes      | Participant-assessed changes in rosacea severity and impact on quality of life |
| Study Types   | Randomized controlled trials                                                   |
| Limitations   | Quality of the studies was generally poor                                      |

#### ODDS RATIOS (OR)

Compares if the odds of an event is the same for two groups

- OR=1 The event is equally likely in both groups.
- OR>1 The event is more likely in the exposed group.

| CLINICAL CONDITION                                       | TREATMENTS                                                                                     | # weeks follow-up in trial | # participants | # trials | OUTCOMES                                                                                                                              | ADVERSE EVENTS                                                                                       |
|----------------------------------------------------------|------------------------------------------------------------------------------------------------|----------------------------|----------------|----------|---------------------------------------------------------------------------------------------------------------------------------------|------------------------------------------------------------------------------------------------------|
| Limited Number of Papules / Pustules                     | Topical metronidazole (0.75% and 1%)<br>Participants: 68 (topical metronidazole), 32 (placebo) | 8–9                        | 2              | ●●○      | Favours topical metronidazole<br>OR: 5.96; 95% CI: 2.96–12.06                                                                         | Mild: including pruritis, skin irritation, dry skin                                                  |
|                                                          | Topical azelaic acid (15% gel, 20% cream)<br>Participants: 260 (azelaic cream), 149 (placebo)  | 9–12                       | 3              | ●●○      | Favours topical azelaic acid<br>OR 2.45; 95% CI: 1.82–3.28                                                                            | Mild and transient: burning, stinging, irritation                                                    |
|                                                          | Benzoyl peroxide 5% / clindamycin 1% gel                                                       | 12                         | 1              |          | Significantly superior to placebo ( $p = .0002$ )                                                                                     | Site burning and itching                                                                             |
|                                                          | Sodium sulfacetamide 10% / sulfur 5%                                                           | n/a                        | 1              |          | Significantly superior to placebo ( $p < .001$ )                                                                                      | Dryness, erythema, pruritis                                                                          |
|                                                          | Topical permethrin v. Topical metronidazole                                                    | n/a                        | 1              |          | Inferior to topical metronidazole                                                                                                     | Not addressed in study                                                                               |
|                                                          | Topical azelaic acid v. Topical metronidazole                                                  | 15                         | 2              |          | No statistical significant difference in efficacy between topical metronidazole and topical azelaic acid                              | Mild to moderate, mostly transient: burning, stinging, irritation                                    |
|                                                          | Metronidazole plus sunscreen SPF 15                                                            | n/a                        | 1              |          | Poorly designed study favoured metronidazole plus sun-screen over placebo                                                             | Not addressed in study                                                                               |
| More Extensive Skin Lesions                              | Tetracycline                                                                                   | 4–6                        | 3              |          | Oral tetracycline is more effective than placebo by physician assessment (OR: 6.06; 95% CI: 2.96–12.42) but not by patient assessment | Not addressed in study                                                                               |
|                                                          | Oral metronidazole v. Oral oxytetracycline                                                     | 12                         | 1              |          | No statistically significant difference between the two therapies                                                                     | Not addressed in study                                                                               |
|                                                          | Oral tetracycline v. Topical metronidazole                                                     | 8                          | 2              |          |                                                                                                                                       |                                                                                                      |
|                                                          | Benzoyl peroxide 5% / erythromycin 3% gel and metronidazole                                    | 4                          | 1              |          |                                                                                                                                       |                                                                                                      |
|                                                          | Clarithromycin and omeprazole                                                                  | n/a                        | 1              |          | Impossible to draw conclusions from data                                                                                              | Not addressed in study                                                                               |
| Flushing                                                 | Rilmenidine                                                                                    | n/a                        | 1              |          | Rilmenidine not significantly better than placebo                                                                                     | Not addressed in study                                                                               |
| Eye Irritation (Ocular Rosacea)                          | Tetracycline (250 mg b.d. for 6 weeks)                                                         | 6                          | 1              |          | Oral oxytetracycline may be more effective for ocular rosacea by physician assessment                                                 | Not addressed in study                                                                               |
| No randomized controlled trials available for evaluation |                                                                                                |                            |                |          | STRENGTH OF RESEARCH EVIDENCE                                                                                                         |                                                                                                      |
| Limited Number of Papules / Pustules                     | Tretinoin                                                                                      |                            |                |          | Ratings are based on the overall quantity and quality of clinical evidence.                                                           |                                                                                                      |
| More Extensive Skin Lesions                              | Ampicillin                                                                                     |                            |                |          | ●●●<br>STRONG                                                                                                                         | Results consistent from high quality studies. Conclusions unlikely to change with further research.  |
| Flushing                                                 | Clonidine                                                                                      |                            |                |          |                                                                                                                                       |                                                                                                      |
| Vascular Rosacea                                         | Pulse dye laser, intense pulsed light                                                          |                            |                |          |                                                                                                                                       |                                                                                                      |
| Severe or Persistent Rosacea                             | Isotretinoin                                                                                   |                            |                |          | ●●○<br>MODERATE                                                                                                                       | Current research supports findings, however conclusions could change with further research.          |
| Eye Irritation (Ocular Rosacea)                          | Metronidazole; Fusidic acid gel                                                                |                            |                |          | ●○○<br>WEAK                                                                                                                           | Limited studies available for drawing conclusions, or existing studies have significant limitations. |
| Rhinophyma                                               | Isotretinoin (low-dose); Laser therapy; Surgical Interventions                                 |                            |                |          |                                                                                                                                       |                                                                                                      |

# Rosacea

## Systematic Review of Treatments

*Source: van Zuuren EJ, Gupta AK, Grover MD, Graber M, Hollis S. Systematic review of rosacea treatments. J Am Acad Dermatol. 2007 Jan;56(1):107-15*

**Conflicts of Interest:** None identified to the journal citation

## SYSTEMATIC REVIEW SYNOPSIS

### PURPOSE

To assess the evidence for the efficacy and safety of rosacea therapies.

### METHODS

- Medline, EMBASE, the Cochrane Library, BIOSIS, and the Science Citation Index were systematically searched.
- Study selection, assessment of methodologic quality, data extraction, and analysis were carried out by two independent researchers.

### RESULTS

- 29 studies met the inclusion criteria.
- Topical metronidazole is more effective than placebo (odds ratio 5.96, 95% confidence interval 2.95–12.06).
- Azelaic acid is more effective than placebo (odds ratio 2.45, 95% confidence interval 1.82–3.28).
- Firm conclusions could not be drawn about other pharmacological and non-pharmacological therapies.

## APPLYING THE EVIDENCE

### EXAMPLE

- A 35-year old woman had developed moderate swelling, erythma and papules of the central part of her face for 8 weeks.
- She had been applying various topical cosmetic products sold for acne withno change in her condition.
- One of her hobbies is hiking and she noticed sun exposure aggravated her skin condition, also resulting in burning and stinging sensations.

### TREATMENT

- The patient consulted her family physician who prescribed topical treatment with metronidazole 1% and oral treatment with metronidazole 500 mg twice daily for two weeks.

### OUTCOME & FOLLOW-UP

- After an initial worsening during the first 3 days the skin condition improved.
- The topical treatment was continued twice daily for 4 weeks and then reduced to once daily for an additional 4 weeks. As well, sun screen was applied whenever outdoors.

The case study used in Applying the Evidence is adapted from: [rosacea.dermis.net/content/e05quizcase/index\\_eng.html](http://rosacea.dermis.net/content/e05quizcase/index_eng.html). Used with permission.

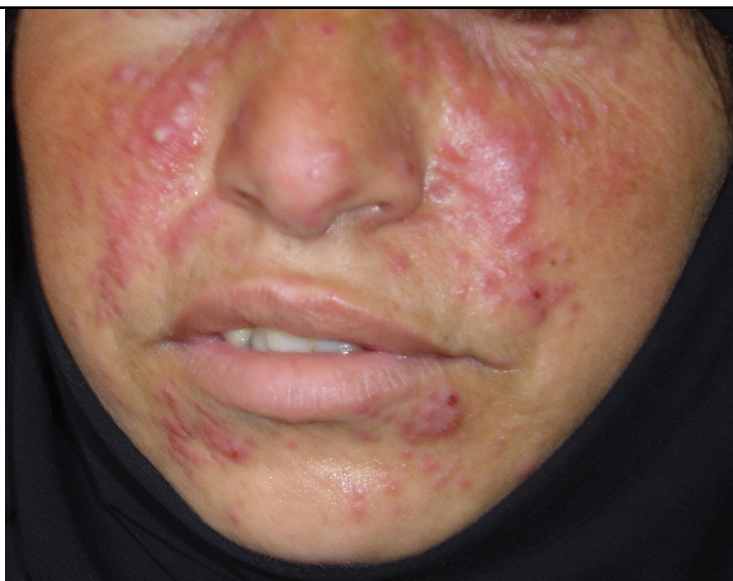

© DermAtlas; [www.DermAtlas.org](http://www.DermAtlas.org). Used with permission.

# Rosacea

## Systematic Review of Treatments

Source: van Zuuren EJ, Gupta AK, Grover MD, Graber M, Hollis S. Systematic review of rosacea treatments. J Am Acad Dermatol. 2007 Jan;56(1): 107–15

Conflicts of Interest: None identified to the journal citation

### EXPERT INTERPRETATION

- Topical metronidazole cream (0.75% and 1%) and azelaic acid cream (15 and 20%) are effective and safe for short term use (8–12 weeks).
- Oral oxytetracycline (250mg oxytetracycline dihydrate [Clinimycin] one capsule twice daily) may be effective for ocular rosacea.
- Oral tetracycline is more effective than placebo for physician assessment but not for patient outcomes.
- There is no evidence for use of other agents including dapsone, erythromycin, topical tretinoin, benzoyl peroxide, diet or sun protection.
- The quality of reported studies is poor with lack of blinding, allocation concealment, and intention to treat analysis.

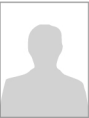

Sharon E. Straus, MD  
University of Toronto,  
Toronto Canada  
  
Conflict of Interest: None identified

### REVIEW INFORMATION

|               |                                                                                                                                                                                                                                                                                                                                             |
|---------------|---------------------------------------------------------------------------------------------------------------------------------------------------------------------------------------------------------------------------------------------------------------------------------------------------------------------------------------------|
| Participants  | Adults, 19 years or older with moderate to severe rosacea                                                                                                                                                                                                                                                                                   |
| Interventions | Any type of rosacea treatment                                                                                                                                                                                                                                                                                                               |
| Outcomes      | Participant-assessed changes in rosacea severity and impact on quality of life                                                                                                                                                                                                                                                              |
| Study Types   | Randomized controlled trials                                                                                                                                                                                                                                                                                                                |
| Synopsis      | 29 RCTs were included, 8 were classified as high quality<br><br>Topical metronidazole is more effective than placebo (OR 5.96; 95% confidence interval 2.95–12.06)<br><br>Topical azelaic acid is more effective than placebo (OR 2.45; 95% confidence interval 1.82–3.28)<br><br>Firm conclusions could not be drawn about other therapies |

### ODDS RATIOS (OR)

Compares if the odds of an event is the same for two groups

- OR=1    The event is equally likely in both groups.
- OR>1    The event is more likely in the exposed group.

| CLINICAL CONDITION                                       | TREATMENTS                                                                                     | # weeks follow-up in trial | # participants | # trials | OUTCOMES                                                                                                                                                                                                                                                                                                                                                                                                                                                                                                                                                                                                                   | ADVERSE EVENTS                                                    |
|----------------------------------------------------------|------------------------------------------------------------------------------------------------|----------------------------|----------------|----------|----------------------------------------------------------------------------------------------------------------------------------------------------------------------------------------------------------------------------------------------------------------------------------------------------------------------------------------------------------------------------------------------------------------------------------------------------------------------------------------------------------------------------------------------------------------------------------------------------------------------------|-------------------------------------------------------------------|
| Limited Number of Papules / Pustules                     | Topical metronidazole (0.75% and 1%)<br>Participants: 68 (topical metronidazole), 32 (placebo) | 8–9                        | 2              | ●●○      | Favours topical metronidazole<br>OR: 5.96; 95% CI: 2.96–12.06                                                                                                                                                                                                                                                                                                                                                                                                                                                                                                                                                              | Mild: including pruritis, skin irritation, dry skin               |
|                                                          | Topical azelaic acid (15% gel, 20% cream)<br>Participants: 260 (azelaic cream), 149 (placebo)  | 9–12                       | 3              | ●●○      | Favours topical azelaic acid<br>OR 2.45; 95% CI: 1.82–3.28                                                                                                                                                                                                                                                                                                                                                                                                                                                                                                                                                                 | Mild and transient: burning, stinging, irritation                 |
|                                                          | Benzoyl peroxide 5% / clindamycin 1% gel                                                       | 12                         | 1              |          | Significantly superior to placebo ( $p = .0002$ )                                                                                                                                                                                                                                                                                                                                                                                                                                                                                                                                                                          | Site burning and itching                                          |
|                                                          | Sodium sulfacetamide 10% / sulfur 5%                                                           | n/a                        | 1              |          | Significantly superior to placebo ( $p < .001$ )                                                                                                                                                                                                                                                                                                                                                                                                                                                                                                                                                                           | Dryness, erythema, pruritis                                       |
|                                                          | Topical permethrin v. Topical metronidazole                                                    | n/a                        | 1              |          | Inferior to topical metronidazole                                                                                                                                                                                                                                                                                                                                                                                                                                                                                                                                                                                          | Not addressed in study                                            |
|                                                          | Topical azelaic acid v. Topical metronidazole                                                  | 15                         | 2              |          | No statistical significant difference in efficacy between topical metronidazole and topical azelaic acid                                                                                                                                                                                                                                                                                                                                                                                                                                                                                                                   | Mild to moderate, mostly transient: burning, stinging, irritation |
|                                                          | Metronidazole plus sunscreen SPF 15                                                            | n/a                        | 1              |          | Poorly designed study favoured metronidazole plus sun-screen over placebo                                                                                                                                                                                                                                                                                                                                                                                                                                                                                                                                                  | Not addressed in study                                            |
| More Extensive Skin Lesions                              | Tetracycline                                                                                   | 4–6                        | 3              |          | Oral tetracycline is more effective than placebo by physician assessment (OR: 6.06; 95% CI: 2.96–12.42) but not by patient assessment                                                                                                                                                                                                                                                                                                                                                                                                                                                                                      | Not addressed in study                                            |
|                                                          | Oral metronidazole v. Oral oxytetracycline                                                     | 12                         | 1              |          | No statistically significant difference between the two therapies                                                                                                                                                                                                                                                                                                                                                                                                                                                                                                                                                          | Not addressed in study                                            |
|                                                          | Oral tetracycline v. Topical metronidazole                                                     | 8                          | 2              |          |                                                                                                                                                                                                                                                                                                                                                                                                                                                                                                                                                                                                                            |                                                                   |
|                                                          | Benzoyl peroxide 5% / erythromycin 3% gel and metronidazole                                    | 4                          | 1              |          |                                                                                                                                                                                                                                                                                                                                                                                                                                                                                                                                                                                                                            |                                                                   |
|                                                          | Clarithromycin and omeprazole                                                                  | n/a                        | 1              |          | Impossible to draw conclusions from data                                                                                                                                                                                                                                                                                                                                                                                                                                                                                                                                                                                   | Not addressed in study                                            |
| Flushing                                                 | Rilmenidine                                                                                    | n/a                        | 1              |          | Rilmenidine not significantly better than placebo                                                                                                                                                                                                                                                                                                                                                                                                                                                                                                                                                                          | Not addressed in study                                            |
| Eye Irritation (Ocular Rosacea)                          | Tetracycline (250 mg b.d. for 6 weeks)                                                         | 6                          | 1              |          | Oral oxytetracycline may be more effective for ocular rosacea by physician assessment                                                                                                                                                                                                                                                                                                                                                                                                                                                                                                                                      | Not addressed in study                                            |
| No randomized controlled trials available for evaluation |                                                                                                |                            |                |          | <strong>STRENGTH OF RESEARCH EVIDENCE</strong><br><br>Ratings are based on the overall quantity and quality of clinical evidence.<br><br><div>●●●</div> <strong>STRONG</strong><br><br><i>Results consistent from high quality studies. Conclusions unlikely to change with further research.</i><br><br><div>●●○</div> <strong>MODERATE</strong><br><br><i>Current research supports findings, however conclusions could change with further research.</i><br><br><div>●○○</div> <strong>WEAK</strong><br><br><i>Limited studies available for drawing conclusions, or existing studies have significant limitations.</i> |                                                                   |
| Limited Number of Papules / Pustules                     | Tretinoin                                                                                      |                            |                |          |                                                                                                                                                                                                                                                                                                                                                                                                                                                                                                                                                                                                                            |                                                                   |
| More Extensive Skin Lesions                              | Ampicillin                                                                                     |                            |                |          |                                                                                                                                                                                                                                                                                                                                                                                                                                                                                                                                                                                                                            |                                                                   |
| Flushing                                                 | Clonidine                                                                                      |                            |                |          |                                                                                                                                                                                                                                                                                                                                                                                                                                                                                                                                                                                                                            |                                                                   |
| Vascular Rosacea                                         | Pulse dye laser, intense pulsed light                                                          |                            |                |          |                                                                                                                                                                                                                                                                                                                                                                                                                                                                                                                                                                                                                            |                                                                   |
| Severe or Persistent Rosacea                             | Isotretinoin                                                                                   |                            |                |          |                                                                                                                                                                                                                                                                                                                                                                                                                                                                                                                                                                                                                            |                                                                   |
| Eye Irritation (Ocular Rosacea)                          | Metronidazole; Fusidic acid gel                                                                |                            |                |          |                                                                                                                                                                                                                                                                                                                                                                                                                                                                                                                                                                                                                            |                                                                   |
| Rhinophyma                                               | Isotretinoin (low-dose); Laser therapy; Surgical Interventions                                 |                            |                |          |                                                                                                                                                                                                                                                                                                                                                                                                                                                                                                                                                                                                                            |                                                                   |
